# Supplementary material for: Something Fishy about Siamese Fighting Fish (Betta splendens) Sex: Polygenic Sex Determination or a Newly Emerged Sex-Determining Region?
Source: MDPI journal article supplement (doi:10.3390/cells11111764), 2022-05-27
Supplement: s1 [file s1]

**Table S1.** Wild individuals of Siamese fighting fish (*Betta splendens* Regan, 1910) captured from five different geographical regions in Thailand.

| Species                | Sample | Sex    | Locality    |
|------------------------|--------|--------|-------------|
| <i>Betta splendens</i> | SP1m1  | Male   | Bangkok     |
| <i>Betta splendens</i> | SP1m2  | Male   | Bangkok     |
| <i>Betta splendens</i> | SP1m3  | Male   | Bangkok     |
| <i>Betta splendens</i> | SP1m4  | Male   | Bangkok     |
| <i>Betta splendens</i> | SP1m5  | Male   | Bangkok     |
| <i>Betta splendens</i> | SP1m6  | Male   | Bangkok     |
| <i>Betta splendens</i> | SP1m7  | Male   | Bangkok     |
| <i>Betta splendens</i> | SP1m8  | Male   | Bangkok     |
| <i>Betta splendens</i> | SP1m9  | Male   | Bangkok     |
| <i>Betta splendens</i> | SP1f1  | Female | Bangkok     |
| <i>Betta splendens</i> | SP1f2  | Female | Bangkok     |
| <i>Betta splendens</i> | SP1f3  | Female | Bangkok     |
| <i>Betta splendens</i> | SP1f4  | Female | Bangkok     |
| <i>Betta splendens</i> | SP1f5  | Female | Bangkok     |
| <i>Betta splendens</i> | SP1f6  | Female | Bangkok     |
| <i>Betta splendens</i> | SP1f7  | Female | Bangkok     |
| <i>Betta splendens</i> | SP1f8  | Female | Bangkok     |
| <i>Betta splendens</i> | SP1f9  | Female | Bangkok     |
| <i>Betta splendens</i> | SP1f10 | Female | Bangkok     |
| <i>Betta splendens</i> | SP1f11 | Female | Bangkok     |
| <i>Betta splendens</i> | SP1f12 | Female | Bangkok     |
| <i>Betta splendens</i> | SP5m1  | Male   | Chumphon    |
| <i>Betta splendens</i> | SP5m2  | Male   | Chumphon    |
| <i>Betta splendens</i> | SP5m3  | Male   | Chumphon    |
| <i>Betta splendens</i> | SP5m4  | Male   | Chumphon    |
| <i>Betta splendens</i> | SP5m5  | Male   | Chumphon    |
| Species                | Sample | Sex    | Locality    |
| <i>Betta splendens</i> | SP5f1  | Female | Chumphon    |
| <i>Betta splendens</i> | SP5f2  | Female | Chumphon    |
| <i>Betta splendens</i> | SP5f3  | Female | Chumphon    |
| <i>Betta splendens</i> | SP5f4  | Female | Chumphon    |
| <i>Betta splendens</i> | SP5f5  | Female | Chumphon    |
| <i>Betta splendens</i> | SP6m2  | Male   | Surat Thani |
| <i>Betta splendens</i> | SP6m3  | Male   | Surat Thani |
| <i>Betta splendens</i> | SP6m5  | Male   | Surat Thani |
| <i>Betta splendens</i> | SP6m6  | Male   | Surat Thani |
| <i>Betta splendens</i> | SP6m7  | Male   | Surat Thani |
| <i>Betta splendens</i> | SP6f1  | Female | Surat Thani |
| <i>Betta splendens</i> | SP6f2  | Female | Surat Thani |
| <i>Betta splendens</i> | SP6f3  | Female | Surat Thani |
| <i>Betta splendens</i> | SP6f5  | Female | Surat Thani |
| <i>Betta splendens</i> | SP6f6  | Female | Surat Thani |
| <i>Betta splendens</i> | SP6f9  | Female | Surat Thani |
| <i>Betta splendens</i> | SP6f10 | Female | Surat Thani |
| <i>Betta splendens</i> | SPm1   | Male   | Lamphun     |
| <i>Betta splendens</i> | SPm2   | Male   | Lamphun     |

| <i>Betta splendens</i> | SPm3   | Male | Lamphun  |
|------------------------|--------|------|----------|
| <i>Betta splendens</i> | SPm4   | Male | Lamphun  |
| <i>Betta splendens</i> | SPm5   | Male | Lamphun  |
| <i>Betta splendens</i> | SPm6   | Male | Lamphun  |
| <i>Betta splendens</i> | SPm7   | Male | Lamphun  |
| <i>Betta splendens</i> | SPm8   | Male | Lamphun  |
| <i>Betta splendens</i> | SPm9   | Male | Lamphun  |
| Species                | Sample | Sex  | Locality |
| <i>Betta splendens</i> | SPf1   | Male | Lamphun  |
| <i>Betta splendens</i> | SPf2   | Male | Lamphun  |

**Table S2.** Eight microsatellite primer sets developed from Siamese fighting fish (*Betta splendens* Regan, 1910) sourced from Chailertit et al. (2014).

| Locus     | Primer sequence (5'–3')                                | Repeat                              | Ta (°C) | Accession | Size (bp) |
|-----------|--------------------------------------------------------|-------------------------------------|---------|-----------|-----------|
| BettaMS4  | F: GTTTCATCAGGAGCAGCAGCATAA<br>R: CTGTTTGATGGCCGACTTTT | (GA) <sub>n</sub>                   | 59      | AB777403  | 259–315   |
| BettaMS5  | F: GTTTCGTCACCTTCTGAGCAAACA<br>R: AAATGCGCTGGGTAGACTTG | (GA) <sub>n</sub>                   | 59      | AB777406  | 198–218   |
| BettaMS8  | F: CGTGAGCTGCAAAGAAAACA<br>R: CTGTTTGATGGCCGACTTTT     | (GA) <sub>n</sub>                   | 57      | AB777407  | 223       |
| BettaMS15 | F: ACTGTAACCGGGCTGTTCTG<br>R: AACGCACCCAGAAACAAATC     | (GA) <sub>n</sub>                   | 57      | AB777411  | 216–225   |
| BettaMS17 | F: AAGCAGGTCTTTCACCTCCA<br>R: TCACCTGCGTCTAAGTCAA      | (GA) <sub>n</sub>                   | 61      | AB777413  | 194–221   |
| BettaMS23 | F: GTTTGAGAGAAATGGGTTCTTCG<br>R: TCACTACGCTGCCAAATCAG  | (CT) <sub>n</sub> (CA) <sub>n</sub> | 55      | AB777415  | 259–315   |
| BettaMS25 | F: GTTTGGGTAAAACCCAACTCTGG<br>R: AACGTCACGTGGAACAGATG  | (GT) <sub>n</sub>                   | 55      | AB777416  | 194–224   |
| BettaMS40 | F: CAGTACATTTGACTGATCGCAGA<br>R: CAGGATGCTTCCTTGGGTAA  | (GA) <sub>n</sub>                   | 57      | AB777421  | 136–165   |

Chailertit V, Swatdipong A, Peyachoknagul S, Salaenoi J, Srikulnath K. Isolation and characterization of novel microsatellite markers from Siamese fighting fish (*Betta splendens*, Osphronemidae, Anabantidae) and their transferability to related species, *B. smaragdina* and *B. imbellis*. Genet Mol Res. 2014; 13: 7157–7162. <https://doi.org/10.4238/2014.September.5.1>. Regan CT. The Asiatic fishes of the family Anabantidae. Proc Zool Soc Lond. 1910; B1909: 767–787.

**Table S3.** Mean number of alleles per locus based on single-nucleotide polymorphism (SNP) and presence-absence (PA) loci from 75 Siamese fighting fish (*Betta splendens* Regan, 1910).

| Mean | N     | Na    | Ne    | I     | Ho    | He    | uHe   | F     |
|------|-------|-------|-------|-------|-------|-------|-------|-------|
|      | 3.693 | 0.466 | 0.466 | 0.000 | 0.000 | 0.000 | 0.000 |       |
| SE   | 0.025 | 0.002 | 0.002 | 0.000 | 0.000 | 0.000 | 0.000 | 0.000 |

Regan CT. The Asiatic fishes of the family Anabantidae. Proc Zool Soc Lond. 1910; B1909: 767–787.

**Table S4.**  $F_{ST}$  showed significant differences between commercial populations of Siamese fighting fish (*Betta splendens* Regan, 1910).

| Pop1    | Pop2    | Fst   | p-value |
|---------|---------|-------|---------|
| BSP_G   | BSP_GIA | 0.465 | 0.001   |
| BSP_G   | BSP_GL  | 0.658 | 0.001   |
| BSP_GIA | BSP_GL  | 0.343 | 0.001   |
| BSP_G   | BSP_O   | 0.726 | 0.001   |
| BSP_GIA | BSP_O   | 0.353 | 0.001   |
| BSP_GL  | BSP_O   | 0.583 | 0.001   |
| BSP_G   | BSP_W   | 0.625 | 0.001   |
| BSP_GIA | BSP_W   | 0.294 | 0.001   |
| BSP_GL  | BSP_W   | 0.500 | 0.001   |
| BSP_O   | BSP_W   | 0.522 | 0.001   |

Regan CT. The Asiatic fishes of the family Anabantidae. Proc Zool Soc Lond. 1910; B1909: 767–787.

**Table S5.** Genetic divergence among (net nucleotide distance) and within (expected heterozygosity) Siamese fighting fish (*Betta splendens* Regan, 1910) populations, and the proportion of membership of the population samples.

| Clusters  | Net nucleotide distance |           |           |           | Expected heterozygosity | Proportion of membership |
|-----------|-------------------------|-----------|-----------|-----------|-------------------------|--------------------------|
|           | Cluster A               | Cluster B | Cluster C | Cluster D |                         |                          |
| Cluster A | -                       | 0.1980    | 0.1380    | 0.1586    | 0.21                    | 0.29                     |
| Cluster B | 0.1980                  | -         | 0.2426    | 0.2387    | 0.08                    | 0.23                     |
| Cluster C | 0.1380                  | 0.2426    | -         | 0.1904    | 0.11                    | 0.26                     |
| Cluster D | 0.1586                  | 0.2387    | 0.1904    | -         | 0.13                    | 0.22                     |

Regan CT. The Asiatic fishes of the family Anabantidae. Proc Zool Soc Lond. 1910; B1909: 767–787.

**Table S6.** Primers used for the development of sex-specific markers for the genotyping assay.

| Primer       | Sequence (5'–3')     | Size (bp) |
|--------------|----------------------|-----------|
| PA10004900-F | GGTCATCCTCACACTCCT   | 302       |
| PA10004900-R | CGTTTTATTGTTCCGGCATT |           |

**Table S7.** Genetic divergence among (net nucleotide distance) and within (expected heterozygosity) populations of Siamese fighting fish (*Betta splendens* Regan, 1910), and proportion of membership of wild population samples.

| Clusters  | Net nucleotide distance |           |           | Expected heterozygosity | Proportion of membership |
|-----------|-------------------------|-----------|-----------|-------------------------|--------------------------|
|           | Cluster A               | Cluster B | Cluster C |                         |                          |
| Cluster A | -                       | 0.1964    | 0.1607    | 0.55                    | 0.28                     |
| Cluster B | 0.1964                  | -         | 0.0466    | 0.81                    | 0.43                     |
| Cluster C | 0.1607                  | 0.0466    | -         | 0.86                    | 0.29                     |

Regan CT. The Asiatic fishes of the family Anabantidae. Proc Zool Soc Lond. 1910; B1909: 767–787.

**Table S8.** *In silico* chromosome mapping aligned to chromosome-level assembly of Siamese fighting fish (*Betta splendens* Regan, 1910) (accession: GCF\_900634795.3).

| Locus id    | Chromosome | Region            | %Query Coverage (60%) | E-Value (0.005) | Percent Identity (55%) |
|-------------|------------|-------------------|-----------------------|-----------------|------------------------|
| PA100003792 | 7          | 9381270–9381338   | 100%                  | 4.00E-28        | 100.00%                |
| PA100004846 | 9          | 27847987–27848032 | 66%                   | 3.00E-11        | 93.48%                 |
| PA100004464 | 9          | 27782844–27782902 | 92%                   | 3.00E-17        | 90.62%                 |
| PA100029208 | 9          | 28233484–28233525 | 60%                   | 9.00E-11        | 95.24%                 |
| PA100004900 | 9          | 30855785–30855834 | 72%                   | 3.00E-16        | 98.00%                 |

| PA100031354 | 9          | 28616136–28616182 | 68%                   | 2.00E-13        | 95.74%                 |
|-------------|------------|-------------------|-----------------------|-----------------|------------------------|
| PA100004510 | 9          | 28543911–28543979 | 100%                  | 2.00E-26        | 98.55%                 |
| PA100028166 | 9          | 27952615–27952678 | 92%                   | 1.00E-22        | 96.88%                 |
| PA100004858 | 9          | 28667903–28667952 | 72%                   | 3.00E-16        | 98.00%                 |
| PA100004899 | 9          | 30159035–30159077 | 62%                   | 2.00E-12        | 97.67%                 |
| PA100029201 | 9          | 29543275–29543327 | 76%                   | 1.00E-16        | 96.23%                 |
| PA100029211 | 9          | 28750932–28750985 | 78%                   | 3.00E-17        | 96.30%                 |
| PA100004782 | 9          | 31334950–31335019 | 100%                  | 7.00E-25        | 97.14%                 |
| PA100011835 | 9          | 28469956–28470024 | 100%                  | 2.00E-25        | 97.10%                 |
| PA100004843 | 9          | 29420491–29420535 | 68%                   | 1.00E-09        | 91.11%                 |
| PA100027514 | 9          | 28423221–28423289 | 100%                  | 2.00E-25        | 97.10%                 |
| PA100017083 | 9          | 29736793–29736861 | 100%                  | 2.00E-25        | 97.10%                 |
| PA100021008 | 9          | 27255876–27255943 | 98%                   | 7.00E-25        | 97.06%                 |
| PA100012407 | 9          | 28875037–28875093 | 100%                  | 2.00E-13        | 82.61%                 |
| PA100004465 | 9          | 27804560–27804625 | 97%                   | 3.00E-23        | 97.01%                 |
| PA100025925 | 9          | 31673853–31673921 | 100%                  | 2.00E-25        | 97.10%                 |
| PA100004721 | 9          | 27067733–27067790 | 84%                   | 8.00E-18        | 94.83%                 |
| PA100022272 | 9          | 27045850–27045901 | 75%                   | 3.00E-16        | 96.15%                 |
| PA100004670 | 9          | 31930035–31930103 | 100%                  | 8.00E-24        | 95.65%                 |
| PA100004897 | 9          | 27316841–27316886 | 66%                   | 6.00E-13        | 95.65%                 |
| PA100004903 | 9          | 31072802–31072845 | 63%                   | 1.00E-14        | 100.00%                |
| Locus id    | Chromosome | Region            | %Query Coverage (60%) | E-Value (0.005) | Percent Identity (55%) |
| PA100004567 | 9          | 27255731–27255795 | 94%                   | 2.00E-24        | 98.46%                 |
| PA100020889 | 9          | 29921025–29921093 | 100%                  | 5.00E-20        | 91.30%                 |
| PA100004779 | 9          | 26334675–26334743 | 100%                  | 2.00E-26        | 98.55%                 |
| PA100029590 | 9          | 29546367–29546416 | 72%                   | 4.00E-15        | 96.00%                 |
| PA100004412 | 9          | 28450542–28450581 | 89%                   | 2.00E-12        | 100.00%                |
| PA100021089 | 9          | 26285178–26285246 | 100%                  | 1.00E-22        | 94.20%                 |
| PA100004556 | 9          | 30653569–30653635 | 98%                   | 3.00E-16        | 90.00%                 |
| PA100004680 | 9          | 3410145–3410216   | 100%                  | 1.00E-08        | 77.78%                 |
| PA100030209 | 9          | 27689584–27689652 | 100%                  | 2.00E-25        | 97.10%                 |
| PA100004773 | 9          | 29259455–29259523 | 100%                  | 2.00E-26        | 98.55%                 |
| PA100004645 | 9          | 29259455–29259523 | 98%                   | 1.00E-27        | 100.00%                |
| PA100004594 | 9          | 29740306–29740366 | 88%                   | 4.00E-21        | 96.72%                 |
| PA100014942 | 9          | 28979422–28979490 | 100%                  | 2.00E-25        | 97.10%                 |
| PA100004619 | 9          | 28238728–28238797 | 100%                  | 3.00E-23        | 95.71%                 |
| PA100004404 | 9          | 27876374–27876450 | 100%                  | 4.00E-22        | 89.61%                 |
| PA100004762 | 9          | 30003040–30003107 | 100%                  | 2.00E-24        | 97.10%                 |
| PA100004801 | 9          | 30620699–30620763 | 100%                  | 6.00E-13        | 85.51%                 |
| PA100004689 | 9          | 28266822–28266891 | 100%                  | 7.00E-25        | 97.14%                 |
| PA100019317 | 9          | 30706839–30706907 | 100%                  | 2.00E-25        | 97.10%                 |
| PA100010245 | 9          | 29244547–29244615 | 100%                  | 2.00E-25        | 97.10%                 |
| PA100004696 | 9          | 26797741–26797810 | 100%                  | 7.00E-25        | 97.14%                 |
| PA100004408 | 9          | 28019594–28019662 | 100%                  | 1.00E-22        | 94.20%                 |
| PA100004563 | 9          | 29100891–29100959 | 100%                  | 1.00E-22        | 94.20%                 |
| PA100004684 | 9          | 31129329–31129397 | 100%                  | 4.00E-28        | 100.00%                |
| PA100004381 | 9          | 27572488–27572556 | 100%                  | 4.00E-28        | 100.00%                |
| PA100013910 | 9          | 27498305–27498373 | 100%                  | 2.00E-25        | 97.10%                 |
| PA100020461 | 9          | 30600574–30600642 | 100%                  | 2.00E-25        | 97.10%                 |
| PA100007736 | 9          | 31666984–31667052 | 100%                  | 2.00E-25        | 97.10%                 |

| PA100017244  | 9          | 28247164–28247232 | 100%                  | 2.00E-25        | 97.10%                 |
|--------------|------------|-------------------|-----------------------|-----------------|------------------------|
| PA100024280  | 9          | 26618215–26618278 | 92%                   | 2.00E-25        | 100.00%                |
| PA100002311  | 9          | 29585295–29585363 | 100%                  | 4.00E-28        | 100.00%                |
| PA100004745  | 9          | 30712428–30712496 | 100%                  | 4.00E-28        | 100.00%                |
| Locus id     | Chromosome | Region            | %Query Coverage (60%) | E-Value (0.005) | Percent Identity (55%) |
| PA100004685  | 9          | 29878539–29878606 | 98%                   | 7.00E-25        | 97.06%                 |
| PA100004705  | 9          | 27696047–27696107 | 76%                   | 9.00E-11        | 85.25%                 |
| PA100004431  | 9          | 27563896–27563965 | 100%                  | 3.00E-23        | 95.71%                 |
| PA100004615  | 9          | 27648339–27648407 | 100%                  | 4.00E-28        | 100.00%                |
| PA100004550  | 9          | 27231100–27231168 | 100%                  | 2.00E-25        | 97.10%                 |
| PA100004551  | 9          | 30132934–30133001 | 100%                  | 1.00E-21        | 94.20%                 |
| PA100005701  | 9          | 27704093–27704164 | 100%                  | 2.00E-19        | 91.67%                 |
| PA100015466  | 9          | 30427554–30427622 | 100%                  | 4.00E-28        | 100.00%                |
| PA100004628  | 19         | 15184077–15184147 | 100%                  | 2.00E-25        | 97.18%                 |
| PA100002103  | 9          | 12148504–12148572 | 100%                  | 4.00E-28        | 100.00%                |
| SNP100017094 | 9          | 28012619–28012551 | 100%                  | 4.00E-28        | 100.00%                |
| SNP100017206 | 9          | 27467354–27467422 | 100%                  | 4.00E-28        | 100.00%                |
| SNP100029210 | 9          | 28750985–28750932 | 78%                   | 5.00E-20        | 100.00%                |
| SNP100029235 | 9          | 29250216–29250263 | 69%                   | 4.00E-15        | 97.92%                 |
| SNP100007965 | 9          | 28686518–28686586 | 100%                  | 4.00E-28        | 100.00%                |

Regan CT. The Asiatic fishes of the family Anabantidae. Proc Zool Soc Lond. 1910; B1909: 767–787.

**Table S9.** Gene pathways in the putative male-determining region (pMDR) of chromosome 9.

| Accession   | Start    | Stop     | Gene symbol     |
|-------------|----------|----------|-----------------|
| NC_040889.1 | 26947758 | 26970809 | <i>aacs</i>     |
| NC_040889.1 | 30847795 | 30861426 | <i>adam9</i>    |
| NC_040889.1 | 26390420 | 26404142 | <i>adamts12</i> |
| NC_040889.1 | 28962819 | 29033180 | <i>adamts3</i>  |
| NC_040889.1 | 30211382 | 30223171 | <i>adamtsl2</i> |
| NC_040889.1 | 26385900 | 26390295 | <i>agpat9l</i>  |
| NC_040889.1 | 29570659 | 29619317 | <i>antxr2a</i>  |
| NC_040889.1 | 26661903 | 26665407 | <i>areg</i>     |
| NC_040889.1 | 26467158 | 26537032 | <i>arl15a</i>   |
| NC_040889.1 | 29189724 | 29196923 | <i>ascc2</i>    |
| NC_040889.1 | 29474061 | 29478641 | <i>bmp3</i>     |
| NC_040889.1 | 30928254 | 31034308 | <i>c5</i>       |
| NC_040889.1 | 28716487 | 28734760 | <i>camsap1b</i> |
| NC_040889.1 | 28281143 | 28293533 | <i>castor1</i>  |
| NC_040889.1 | 29388118 | 29402305 | <i>cds1</i>     |
| NC_040889.1 | 26877368 | 26880870 | <i>cenatac</i>  |
| NC_040889.1 | 28844892 | 28848124 | <i>cfap157</i>  |
| NC_040889.1 | 29480720 | 29530595 | <i>cfap299</i>  |
| NC_040889.1 | 31073113 | 31077836 | <i>ciz1b</i>    |
| NC_040889.1 | 27676311 | 27686895 | <i>ckap2l</i>   |
| NC_040889.1 | 29915395 | 29925731 | <i>cnot6l</i>   |
| NC_040889.1 | 27354336 | 27357287 | <i>coq2</i>     |
| NC_040889.1 | 27923912 | 27934545 | <i>coq5</i>     |
| NC_040889.1 | 26553159 | 26574479 | <i>cspg4ba</i>  |
| NC_040889.1 | 28802387 | 28805356 | <i>ctsla</i>    |
| NC_040889.1 | 28755219 | 28798749 | <i>dapk1</i>    |

|             |          |          |                 |
|-------------|----------|----------|-----------------|
| NC_040889.1 | 30609989 | 30628460 | <i>ddr2l</i>    |
| NC_040889.1 | 28849529 | 28864701 | <i>dmrt1</i>    |
| NC_040889.1 | 28876321 | 28880568 | <i>dmrt2a</i>   |
| NC_040889.1 | 28868330 | 28872251 | <i>dmrt3a</i>   |
| NC_040889.1 | 27399395 | 27402291 | <i>emb</i>      |
| NC_040889.1 | 31860028 | 31863675 | <i>endog</i>    |
| NC_040889.1 | 26654042 | 26655286 | <i>epgn</i>     |
| NC_040889.1 | 26907697 | 26913495 | <i>erap1b</i>   |
| NC_040889.1 | 30832192 | 30841733 | <i>ercc6l</i>   |
| NC_040889.1 | 29931209 | 29943567 | <i>fam102aa</i> |
| NC_040889.1 | 28805986 | 28812813 | <i>fbp2</i>     |
| NC_040889.1 | 28324830 | 28329078 | <i>fbxo21</i>   |
| NC_040889.1 | 28309958 | 28321007 | <i>fbxw8</i>    |
| NC_040889.1 | 29532866 | 29539785 | <i>fgf5</i>     |
| NC_040889.1 | 31798841 | 31808193 | <i>fibcd1a</i>  |
| NC_040889.1 | 26439603 | 26445742 | <i>fsta</i>     |
| NC_040889.1 | 26929452 | 26944939 | <i>gak</i>      |
| NC_040889.1 | 26730830 | 26733022 | <i>gas1a</i>    |
| NC_040889.1 | 26376315 | 26382808 | <i>gck</i>      |
| NC_040889.1 | 27334953 | 27345579 | <i>gldc</i>     |
| NC_040889.1 | 29987080 | 29993754 | <i>gle1</i>     |
| NC_040889.1 | 26675986 | 26677766 | <i>gpx8</i>     |
| NC_040889.1 | 30057754 | 30059936 | <i>gstt1a</i>   |
| NC_040889.1 | 26298921 | 26308788 | <i>hic2</i>     |
| NC_040889.1 | 27405370 | 27407451 | <i>hint2</i>    |
| NC_040889.1 | 27704015 | 27720899 | <i>hs3st1l2</i> |
| NC_040889.1 | 28598582 | 28602520 | <i>hscb</i>     |
| NC_040889.1 | 28018525 | 28024391 | <i>hspb8</i>    |
| NC_040889.1 | 30632390 | 30633453 | <i>ier3</i>     |
| NC_040889.1 | 27583895 | 27588971 | <i>inpp5e</i>   |
| NC_040889.1 | 26696158 | 26699205 | <i>isca1</i>    |
| NC_040889.1 | 26426635 | 26436919 | <i>itga2.2</i>  |
| NC_040889.1 | 27271678 | 27285028 | <i>jak2b</i>    |
| NC_040889.1 | 28817338 | 28844280 | <i>kank1a</i>   |
| NC_040889.1 | 28671809 | 28712932 | <i>kcnt1b</i>   |
| NC_040889.1 | 27881094 | 27922642 | <i>kremen1</i>  |
| NC_040889.1 | 27539101 | 27545163 | <i>krt1-c5</i>  |
| NC_040889.1 | 28177205 | 28234486 | <i>ksr2</i>     |
| NC_040889.1 | 27548017 | 27554766 | <i>lhx6b</i>    |
| NC_040889.1 | 26593906 | 26598594 | <i>lipg</i>     |
| NC_040889.1 | 29925783 | 29928056 | LOC114861258    |
| NC_040889.1 | 27452464 | 27463255 | LOC114861276    |
| NC_040889.1 | 27466983 | 27472812 | LOC114861278    |
| NC_040889.1 | 27463373 | 27466849 | LOC114861280    |
| NC_040889.1 | 27473105 | 27475509 | LOC114861281    |
| NC_040889.1 | 27442440 | 27447386 | LOC114861282    |
| NC_040889.1 | 26600843 | 26608843 | LOC114861288    |
| NC_040889.1 | 30666683 | 30676915 | LOC114861410    |
| NC_040889.1 | 30653013 | 30656027 | LOC114861411    |
| NC_040889.1 | 30646410 | 30648567 | LOC114861412    |
| NC_040889.1 | 31385686 | 31400274 | LOC114861426    |

---

|             |          |          |              |
|-------------|----------|----------|--------------|
| NC_040889.1 | 31370489 | 31385568 | LOC114861427 |
| NC_040889.1 | 31230657 | 31250824 | LOC114861429 |
| NC_040889.1 | 31260556 | 31266183 | LOC114861430 |
| NC_040889.1 | 31302095 | 31319545 | LOC114861431 |
| NC_040889.1 | 31275601 | 31282969 | LOC114861432 |
| NC_040889.1 | 31291908 | 31300200 | LOC114861434 |
| NC_040889.1 | 31224149 | 31230556 | LOC114861435 |
| NC_040889.1 | 31358314 | 31362765 | LOC114861437 |
| NC_040889.1 | 31251062 | 31260188 | LOC114861439 |
| NC_040889.1 | 31335656 | 31339880 | LOC114861440 |
| NC_040889.1 | 31331035 | 31335905 | LOC114861441 |
| NC_040889.1 | 31362807 | 31371539 | LOC114861442 |
| NC_040889.1 | 31356086 | 31358532 | LOC114861443 |
| NC_040889.1 | 31266666 | 31270865 | LOC114861445 |
| NC_040889.1 | 31440505 | 31447663 | LOC114861446 |
| NC_040889.1 | 31319463 | 31324329 | LOC114861447 |
| NC_040889.1 | 31275849 | 31278060 | LOC114861449 |
| NC_040889.1 | 30804291 | 30806963 | LOC114861464 |
| NC_040889.1 | 29997913 | 30022057 | LOC114861525 |
| NC_040889.1 | 31580753 | 31595422 | LOC114861556 |
| NC_040889.1 | 31565052 | 31580614 | LOC114861557 |
| NC_040889.1 | 31552732 | 31557198 | LOC114861561 |
| NC_040889.1 | 31557240 | 31566102 | LOC114861562 |
| NC_040889.1 | 31550514 | 31552950 | LOC114861563 |
| NC_040889.1 | 28812996 | 28815962 | LOC114861570 |
| NC_040889.1 | 31867809 | 31903593 | LOC114861577 |
| NC_040889.1 | 31851389 | 31867680 | LOC114861579 |
| NC_040889.1 | 31029319 | 31033178 | LOC114861588 |
| NC_040889.1 | 30089933 | 30117348 | LOC114861590 |
| NC_040889.1 | 30064696 | 30068313 | LOC114861593 |
| NC_040889.1 | 30068271 | 30087324 | LOC114861594 |
| NC_040889.1 | 30110093 | 30114055 | LOC114861596 |
| NC_040889.1 | 31178484 | 31209170 | LOC114861609 |
| NC_040889.1 | 31116143 | 31147296 | LOC114861657 |
| NC_040889.1 | 30711549 | 30721701 | LOC114861672 |
| NC_040889.1 | 30752529 | 30756488 | LOC114861675 |
| NC_040889.1 | 30738075 | 30740691 | LOC114861676 |
| NC_040889.1 | 27766174 | 27773016 | LOC114861677 |
| NC_040889.1 | 27755119 | 27764077 | LOC114861679 |
| NC_040889.1 | 27734522 | 27736067 | LOC114861681 |
| NC_040889.1 | 27738666 | 27741123 | LOC114861682 |
| NC_040889.1 | 27750508 | 27753637 | LOC114861684 |
| NC_040889.1 | 30274748 | 30285907 | LOC114861703 |
| NC_040889.1 | 30365591 | 30376401 | LOC114861704 |
| NC_040889.1 | 30433406 | 30438281 | LOC114861705 |
| NC_040889.1 | 30506133 | 30509450 | LOC114861707 |
| NC_040889.1 | 30287609 | 30307701 | LOC114861709 |
| NC_040889.1 | 30540752 | 30542898 | LOC114861711 |
| NC_040889.1 | 30467359 | 30469509 | LOC114861712 |
| NC_040889.1 | 30514778 | 30522656 | LOC114861713 |
| NC_040889.1 | 30299217 | 30300757 | LOC114861714 |

---

|             |          |          |              |
|-------------|----------|----------|--------------|
| NC_040889.1 | 26408005 | 26414414 | LOC114861735 |
| NC_040889.1 | 29957565 | 29967750 | LOC114861744 |
| NC_040889.1 | 29974360 | 29986787 | LOC114861745 |
| NC_040889.1 | 29955863 | 29958574 | LOC114861747 |
| NC_040889.1 | 28614345 | 28649712 | LOC114861749 |
| NC_040889.1 | 28654120 | 28656733 | LOC114861752 |
| NC_040889.1 | 31930099 | 31996736 | LOC114861767 |
| NC_040889.1 | 27808311 | 27839898 | LOC114861770 |
| NC_040889.1 | 27845137 | 27847140 | LOC114861771 |
| NC_040889.1 | 27782524 | 27805310 | LOC114861774 |
| NC_040889.1 | 27875754 | 27877818 | LOC114861776 |
| NC_040889.1 | 30146110 | 30156784 | LOC114861778 |
| NC_040889.1 | 30154641 | 30156738 | LOC114861779 |
| NC_040889.1 | 30148533 | 30152970 | LOC114861780 |
| NC_040889.1 | 27610443 | 27639057 | LOC114861860 |
| NC_040889.1 | 29167246 | 29175112 | LOC114861886 |
| NC_040889.1 | 29202324 | 29212302 | LOC114861887 |
| NC_040889.1 | 29212445 | 29252749 | LOC114861890 |
| NC_040889.1 | 30586549 | 30595663 | LOC114861927 |
| NC_040889.1 | 30577713 | 30581238 | LOC114861928 |
| NC_040889.1 | 30566912 | 30577192 | LOC114861929 |
| NC_040889.1 | 28736492 | 28754834 | LOC114861933 |
| NC_040889.1 | 28712935 | 28716341 | LOC114861934 |
| NC_040889.1 | 28661460 | 28672136 | LOC114861935 |
| NC_040889.1 | 28072820 | 28076922 | LOC114861941 |
| NC_040889.1 | 31053147 | 31070931 | LOC114861942 |
| NC_040889.1 | 26699335 | 26703362 | LOC114861996 |
| NC_040889.1 | 26683430 | 26685607 | LOC114861997 |
| NC_040889.1 | 26680561 | 26682824 | LOC114861998 |
| NC_040889.1 | 30880203 | 30891893 | LOC114862033 |
| NC_040889.1 | 27408355 | 27416296 | LOC114862036 |
| NC_040889.1 | 27416299 | 27419104 | LOC114862040 |
| NC_040889.1 | 27420058 | 27427325 | LOC114862042 |
| NC_040889.1 | 29293056 | 29296494 | LOC114862057 |
| NC_040889.1 | 29320082 | 29321426 | LOC114862058 |
| NC_040889.1 | 29025341 | 29027152 | LOC114862132 |
| NC_040889.1 | 27646623 | 27671252 | LOC114862276 |
| NC_040889.1 | 27590126 | 27590997 | LOC114862284 |
| NC_040889.1 | 30680994 | 30689903 | LOC114862288 |
| NC_040889.1 | 30246152 | 30255132 | LOC114862291 |
| NC_040889.1 | 30255282 | 30263473 | LOC114862293 |
| NC_040889.1 | 31752107 | 31775611 | LOC114862295 |
| NC_040889.1 | 31673486 | 31723501 | LOC114862296 |
| NC_040889.1 | 31788604 | 31789180 | LOC114862300 |
| NC_040889.1 | 26334747 | 26363815 | LOC114862306 |
| NC_040889.1 | 29705414 | 29727371 | LOC114862346 |
| NC_040889.1 | 29698450 | 29705424 | LOC114862350 |
| NC_040889.1 | 29637292 | 29676135 | LOC114862353 |
| NC_040889.1 | 29530520 | 29532877 | LOC114862355 |
| NC_040889.1 | 29324558 | 29325591 | LOC114862360 |
| NC_040889.1 | 31171627 | 31173351 | LOC114862374 |



---

|             |          |          |              |
|-------------|----------|----------|--------------|
| NC_040889.1 | 29437884 | 29440048 | LOC114862377 |
| NC_040889.1 | 31456054 | 31460270 | LOC114862421 |
| NC_040889.1 | 31495478 | 31513158 | LOC114862434 |
| NC_040889.1 | 31513078 | 31515114 | LOC114862435 |
| NC_040889.1 | 27696880 | 27700064 | LOC114862463 |
| NC_040889.1 | 27700591 | 27703299 | LOC114862464 |
| NC_040889.1 | 27371894 | 27378521 | LOC114862479 |
| NC_040889.1 | 30197264 | 30199334 | LOC114862486 |
| NC_040889.1 | 30205252 | 30211335 | LOC114862487 |
| NC_040889.1 | 27357656 | 27367042 | LOC114862578 |
| NC_040889.1 | 29766975 | 29787813 | LOC114862579 |
| NC_040889.1 | 29758944 | 29765372 | LOC114862580 |
| NC_040889.1 | 29789030 | 29792817 | LOC114862581 |
| NC_040889.1 | 29728681 | 29732473 | LOC114862582 |
| NC_040889.1 | 29793209 | 29907127 | LOC114862583 |
| NC_040889.1 | 26834998 | 26855055 | LOC114862584 |
| NC_040889.1 | 31630917 | 31635518 | LOC114862627 |
| NC_040889.1 | 26316289 | 26317844 | LOC114862654 |
| NC_040889.1 | 27526244 | 27538207 | LOC114862686 |
| NC_040889.1 | 27505859 | 27514912 | LOC114862689 |
| NC_040889.1 | 27484897 | 27496993 | LOC114862691 |
| NC_040889.1 | 27512410 | 27519323 | LOC114862692 |
| NC_040889.1 | 27497121 | 27504795 | LOC114862693 |
| NC_040889.1 | 27508882 | 27516719 | LOC114862696 |
| NC_040889.1 | 30177071 | 30179990 | LOC114862698 |
| NC_040889.1 | 30180785 | 30182588 | LOC114862699 |
| NC_040889.1 | 31470113 | 31478400 | LOC114862701 |
| NC_040889.1 | 31460595 | 31463081 | LOC114862702 |
| NC_040889.1 | 28369464 | 28382487 | LOC114862722 |
| NC_040889.1 | 26318239 | 26320371 | LOC114862736 |
| NC_040889.1 | 26326720 | 26329139 | LOC114862737 |
| NC_040889.1 | 30234930 | 30240463 | LOC114862743 |
| NC_040889.1 | 31822691 | 31845250 | LOC114862755 |
| NC_040889.1 | 26671707 | 26679047 | LOC114862814 |
| NC_040889.1 | 31485493 | 31493601 | LOC114862846 |
| NC_040889.1 | 31529546 | 31533786 | LOC114862850 |
| NC_040889.1 | 31525589 | 31529795 | LOC114862851 |
| NC_040889.1 | 30902135 | 30912423 | LOC114862886 |
| NC_040889.1 | 27568828 | 27576319 | LOC114862909 |
| NC_040889.1 | 26667864 | 26671346 | LOC114862951 |
| NC_040889.1 | 26922400 | 26929017 | LOC114862952 |
| NC_040889.1 | 27842434 | 27843957 | LOC114862966 |
| NC_040889.1 | 30026153 | 30029523 | LOC114862997 |
| NC_040889.1 | 29732861 | 29735162 | LOC114862998 |
| NC_040889.1 | 29735164 | 29736786 | LOC114863000 |
| NC_040889.1 | 29736789 | 29738807 | LOC114863003 |
| NC_040889.1 | 29738815 | 29751477 | LOC114863004 |
| NC_040889.1 | 30565811 | 30566914 | LOC114863015 |
| NC_040889.1 | 30900295 | 30902003 | LOC114863019 |
| NC_040889.1 | 31165651 | 31171560 | LOC114863022 |
| NC_040889.1 | 31219153 | 31224045 | LOC114863026 |

|             |          |          |                  |
|-------------|----------|----------|------------------|
| NC_040889.1 | 31450008 | 31455586 | LOC114863027     |
| NC_040889.1 | 31732855 | 31737576 | LOC114863036     |
| NC_040889.1 | 31160382 | 31165616 | LOC114863049     |
| NC_040889.1 | 26655758 | 26659333 | LOC114863052     |
| NC_040889.1 | 27320075 | 27330820 | LOC114863188     |
| NC_040889.1 | 27299839 | 27309158 | LOC114863189     |
| NC_040889.1 | 27288537 | 27294893 | LOC114863190     |
| NC_040889.1 | 27266044 | 27270337 | LOC114863194     |
| NC_040889.1 | 30600248 | 30604907 | LOC114863196     |
| NC_040889.1 | 31847400 | 31848113 | LOC114863204     |
| NC_040889.1 | 27674197 | 27675640 | LOC114863211     |
| NC_040889.1 | 27994212 | 28001768 | LOC114863233     |
| NC_040889.1 | 31109301 | 31111435 | LOC114863249     |
| NC_040889.1 | 26881536 | 26901989 | LOC114863263     |
| NC_040889.1 | 26918672 | 26921531 | LOC114863264     |
| NC_040889.1 | 31285660 | 31285769 | LOC114863308     |
| NC_040889.1 | 31644709 | 31644898 | LOC114863315     |
| NC_040889.1 | 30072301 | 30075944 | LOC121201622     |
| NC_040889.1 | 31447858 | 31449395 | LOC121202419     |
| NC_040889.1 | 28307990 | 28309554 | LOC121202429     |
| NC_040889.1 | 30117397 | 30121153 | LOC121202435     |
| NC_040889.1 | 30141744 | 30144781 | LOC121202443     |
| NC_040889.1 | 27213187 | 27214143 | LOC121202446     |
| NC_040889.1 | 31730535 | 31731244 | LOC121202458     |
| NC_040889.1 | 31737578 | 31738607 | LOC121202459     |
| NC_040889.1 | 30186130 | 30204247 | LOC121202467     |
| NC_040889.1 | 29686911 | 29688048 | LOC121202469     |
| NC_040889.1 | 26875954 | 26876507 | LOC121202472     |
| NC_040889.1 | 26590771 | 26594049 | LOC121202490     |
| NC_040889.1 | 28428414 | 28431856 | LOC121202495     |
| NC_040889.1 | 29260468 | 29291460 | LOC121202498     |
| NC_040889.1 | 31271207 | 31273265 | LOC121202500     |
| NC_040889.1 | 31432951 | 31439374 | LOC121202501     |
| NC_040889.1 | 30825273 | 30825967 | LOC121202507     |
| NC_040889.1 | 27996818 | 27998016 | LOC121202509     |
| NC_040889.1 | 27490583 | 27497701 | LOC121202513     |
| NC_040889.1 | 30779079 | 30783521 | <i>lrrc2</i>     |
| NC_040889.1 | 28268066 | 28275438 | <i>lrrc74b</i>   |
| NC_040889.1 | 28602521 | 28610364 | <i>lrrc8ab</i>   |
| NC_040889.1 | 30757222 | 30759779 | <i>mak16</i>     |
| NC_040889.1 | 27391370 | 27399148 | <i>malt1</i>     |
| NC_040889.1 | 29148216 | 29166104 | <i>mapk1</i>     |
| NC_040889.1 | 27352199 | 27354232 | <i>mboat4</i>    |
| NC_040889.1 | 26819282 | 26828425 | <i>mccc2</i>     |
| NC_040889.1 | 31903635 | 31928197 | <i>med27</i>     |
| NC_040889.1 | 27367485 | 27371572 | <i>mfstd10</i>   |
| NC_040889.1 | 30771019 | 30778853 | <i>mfstd14bb</i> |
| NC_040889.1 | 30029680 | 30040396 | <i>mmp11a</i>    |
| NC_040889.1 | 29908845 | 29914893 | <i>mrpl1</i>     |
| NC_040889.1 | 27403052 | 27405145 | <i>mrps30</i>    |
| NC_040889.1 | 26644440 | 26653343 | <i>mthfd2l</i>   |

|             |          |          |                  |
|-------------|----------|----------|------------------|
| NC_040889.1 | 26383150 | 26384512 | <i>myl7</i>      |
| NC_040889.1 | 30231065 | 30234106 | <i>mymk</i>      |
| NC_040889.1 | 26902139 | 26918595 | <i>naaladl1</i>  |
| NC_040889.1 | 26445944 | 26458479 | <i>ndufs4</i>    |
| NC_040889.1 | 28329386 | 28347895 | <i>nf2a</i>      |
| NC_040889.1 | 28275548 | 28280654 | <i>nipsnap1</i>  |
| NC_040889.1 | 28242420 | 28267889 | <i>nos1</i>      |
| NC_040889.1 | 29043635 | 29057536 | <i>npffr2a</i>   |
| NC_040889.1 | 30263524 | 30266833 | <i>nudt12</i>    |
| NC_040889.1 | 30807367 | 30813917 | <i>nudt18</i>    |
| NC_040889.1 | 30862051 | 30877428 | <i>ogdha</i>     |
| NC_040889.1 | 26363941 | 26369046 | <i>osmr</i>      |
| NC_040889.1 | 30060271 | 30064620 | <i>p2rx7</i>     |
| NC_040889.1 | 26418444 | 26423252 | <i>paip1</i>     |
| NC_040889.1 | 28161738 | 28163157 | <i>pebp1</i>     |
| NC_040889.1 | 31776689 | 31798345 | <i>phf19</i>     |
| NC_040889.1 | 27579065 | 27583112 | <i>pmpca</i>     |
| NC_040889.1 | 27475705 | 27480005 | <i>poli</i>      |
| NC_040889.1 | 31621783 | 31630895 | <i>pomt1</i>     |
| NC_040889.1 | 30893092 | 30895326 | <i>ppiaa</i>     |
| NC_040889.1 | 29108839 | 29124773 | <i>ppil2</i>     |
| NC_040889.1 | 28610513 | 28612049 | <i>ppil3</i>     |
| NC_040889.1 | 31034658 | 31046129 | <i>prdm12b</i>   |
| NC_040889.1 | 30376460 | 30537606 | <i>prdm6</i>     |
| NC_040889.1 | 29546429 | 29551571 | <i>prdm8b</i>    |
| NC_040889.1 | 29461597 | 29473788 | <i>prkg2</i>     |
| NC_040889.1 | 27378506 | 27386628 | <i>prrb</i>      |
| NC_040889.1 | 28389423 | 28395963 | <i>prodhb</i>    |
| NC_040889.1 | 26870745 | 26874508 | <i>psat1</i>     |
| NC_040889.1 | 29993811 | 29997071 | <i>ptgesl</i>    |
| NC_040889.1 | 27561935 | 27567978 | <i>ptgs1</i>     |
| NC_040889.1 | 30172282 | 30176686 | <i>ptrh1</i>     |
| NC_040889.1 | 31645280 | 31673357 | <i>rapgef1a</i>  |
| NC_040889.1 | 29442356 | 29458876 | <i>rasgef1ba</i> |
| NC_040889.1 | 28173323 | 28176313 | <i>rhc5</i>      |
| NC_040889.1 | 29196458 | 29201042 | <i>rnf215</i>    |
| NC_040889.1 | 28301646 | 28307996 | <i>rnft2</i>     |
| NC_040889.1 | 30707477 | 30710220 | <i>rsph14</i>    |
| NC_040889.1 | 28441507 | 28472523 | <i>rtn4r</i>     |
| NC_040889.1 | 29099077 | 29108555 | <i>rufy3</i>     |
| NC_040889.1 | 29296452 | 29314938 | <i>rusc2</i>     |
| NC_040889.1 | 26369462 | 26372396 | <i>sb:cb288</i>  |
| NC_040889.1 | 27430082 | 27442135 | <i>scarb2a</i>   |
| NC_040889.1 | 30813957 | 30814767 | <i>sdhaf1</i>    |
| NC_040889.1 | 29969400 | 29972982 | <i>seta</i>      |
| NC_040889.1 | 30126043 | 30160562 | <i>sh2d3cb</i>   |
| NC_040889.1 | 29972841 | 29974309 | si:ch211-51h9.7  |
| NC_040889.1 | 27773124 | 27780577 | si:dkey-13n15.2  |
| NC_040889.1 | 27848454 | 27851755 | si:dkey-174n20.1 |
| NC_040889.1 | 26574900 | 26578221 | si:dkey-193c22.1 |
| NC_040889.1 | 28016406 | 28017950 | si:dkey-1k23.3   |

---

|             |          |          |                  |
|-------------|----------|----------|------------------|
| NC_040889.1 | 26990093 | 27127030 | si:dkey-215k6.1  |
| NC_040889.1 | 30721925 | 30740670 | si:dkey-220o5.5  |
| NC_040889.1 | 26320571 | 26326690 | si:dkey-88e18.2  |
| NC_040889.1 | 26610250 | 26641723 | <i>slc20a2</i>   |
| NC_040889.1 | 29948112 | 29954084 | <i>slc25a25a</i> |
| NC_040889.1 | 30240557 | 30245001 | <i>slc2a8</i>    |
| NC_040889.1 | 29174628 | 29187900 | <i>slc39a14</i>  |
| NC_040889.1 | 29071173 | 29095819 | <i>slc4a4a</i>   |
| NC_040889.1 | 28919916 | 28947506 | <i>smarca2</i>   |
| NC_040889.1 | 30022262 | 30026145 | <i>smarcb1a</i>  |
| NC_040889.1 | 26539583 | 26547664 | <i>snx18a</i>    |
| NC_040889.1 | 30496211 | 30505238 | <i>snx2</i>      |
| NC_040889.1 | 30763437 | 30771095 | <i>spinb</i>     |
| NC_040889.1 | 28298920 | 28301786 | <i>spring1</i>   |
| NC_040889.1 | 30704911 | 30707333 | <i>srp19</i>     |
| NC_040889.1 | 28024516 | 28062730 | <i>srrm4</i>     |
| NC_040889.1 | 28106578 | 28113348 | <i>suds3</i>     |
| NC_040889.1 | 27851835 | 27865333 | <i>susd2</i>     |
| NC_040889.1 | 27521788 | 27523944 | <i>tal2</i>      |
| NC_040889.1 | 28115190 | 28161250 | <i>taok3a</i>    |
| NC_040889.1 | 26756249 | 26768711 | <i>tars1</i>     |
| NC_040889.1 | 28320853 | 28324709 | <i>tesca</i>     |
| NC_040889.1 | 29402297 | 29406192 | <i>tmem175</i>   |
| NC_040889.1 | 26790928 | 26817060 | <i>tmem8b</i>    |
| NC_040889.1 | 30161082 | 30164577 | <i>tor2a</i>     |
| NC_040889.1 | 31786335 | 31786405 | <i>trnag-ccc</i> |
| NC_040889.1 | 31786698 | 31786768 | <i>trnag-gcc</i> |
| NC_040889.1 | 27530138 | 27530209 | <i>trnag-ucc</i> |
| NC_040889.1 | 27530395 | 27530466 | <i>trnag-ucc</i> |
| NC_040889.1 | 30914429 | 30923702 | <i>tti2</i>      |
| NC_040889.1 | 26685787 | 26695775 | <i>tut7</i>      |
| NC_040889.1 | 27640016 | 27646046 | <i>ubac1</i>     |
| NC_040889.1 | 26329445 | 26334078 | <i>utp15</i>     |
| NC_040889.1 | 28164119 | 28169110 | <i>vsig10</i>    |
| NC_040889.1 | 29334076 | 29387110 | <i>wdfy3</i>     |
| NC_040889.1 | 28169984 | 28173367 | <i>wsb2</i>      |
| NC_040889.1 | 27986075 | 27988606 | <i>xbp1</i>      |
| NC_040889.1 | 26372588 | 26376263 | <i>ykt6</i>      |
| NC_040889.1 | 29128818 | 29146694 | <i>ypel1</i>     |
| NC_040889.1 | 30677843 | 30680916 | zgc:101664       |
| NC_040889.1 | 28612462 | 28614211 | zgc:101858       |
| NC_040889.1 | 27331288 | 27334751 | zgc:114041       |
| NC_040889.1 | 27479902 | 27486356 | zgc:152968       |
| NC_040889.1 | 30307803 | 30365163 | <i>znf608</i>    |
| NC_040889.1 | 27927599 | 27975161 | <i>znrf3</i>     |

---

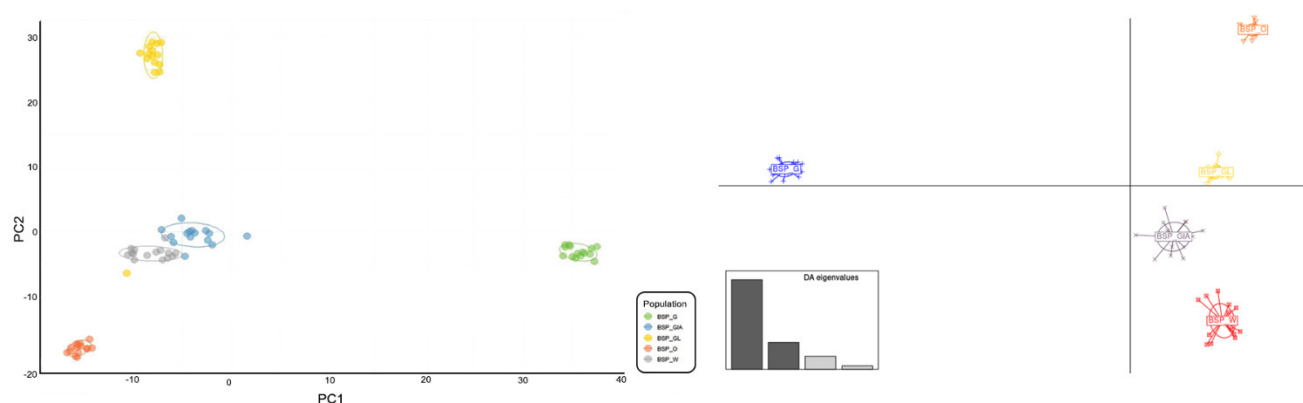

**Figure S1.** Principal component analysis of Siamese fighting fish (*Betta splendens* Regan, 1910) from local farms and discriminant analysis of principal component (DAPC) scatter plots of individuals.

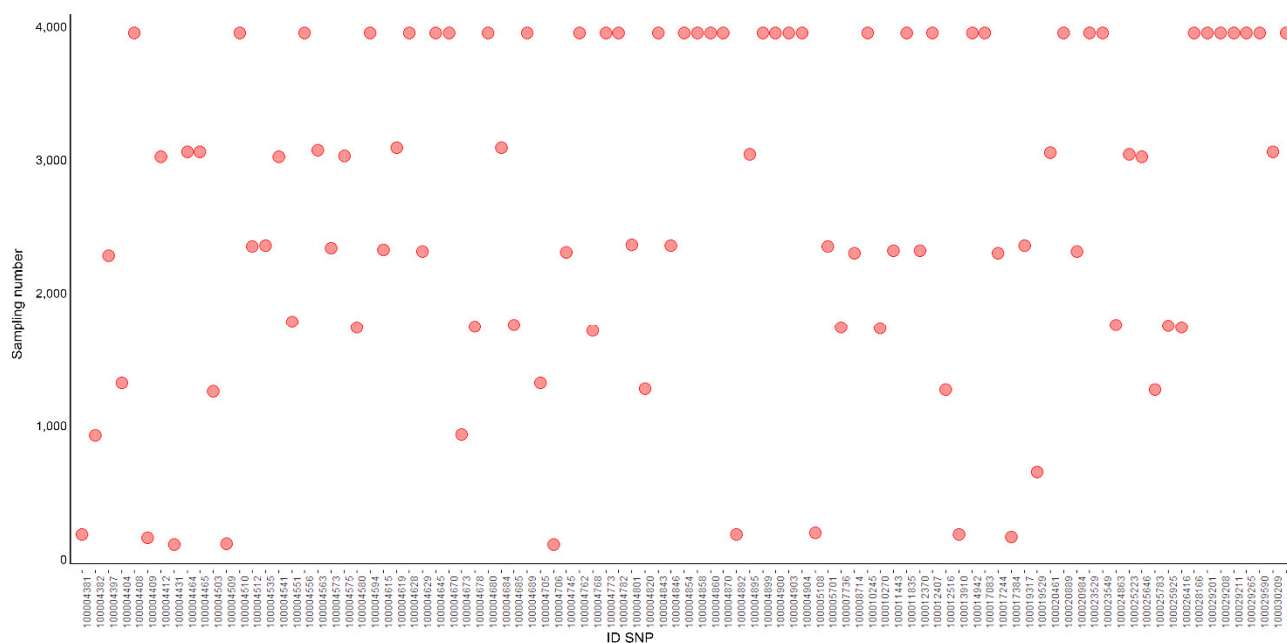

**Figure S2.** Monte Carlo randomization in Siamese fighting fish (*Betta splendens* Regan, 1910).

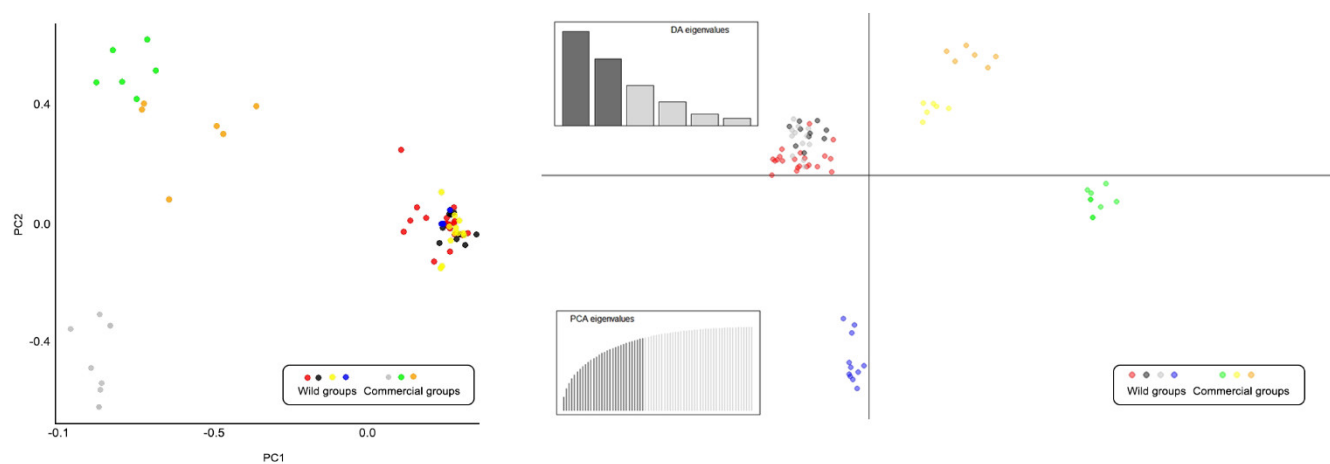

**Figure S3.** Principal component analysis of wild and commercial groups of Siamese fighting fish (*Betta splendens* Regan, 1910) and discriminant analysis of principal component (DAPC) scatter plots of individuals.

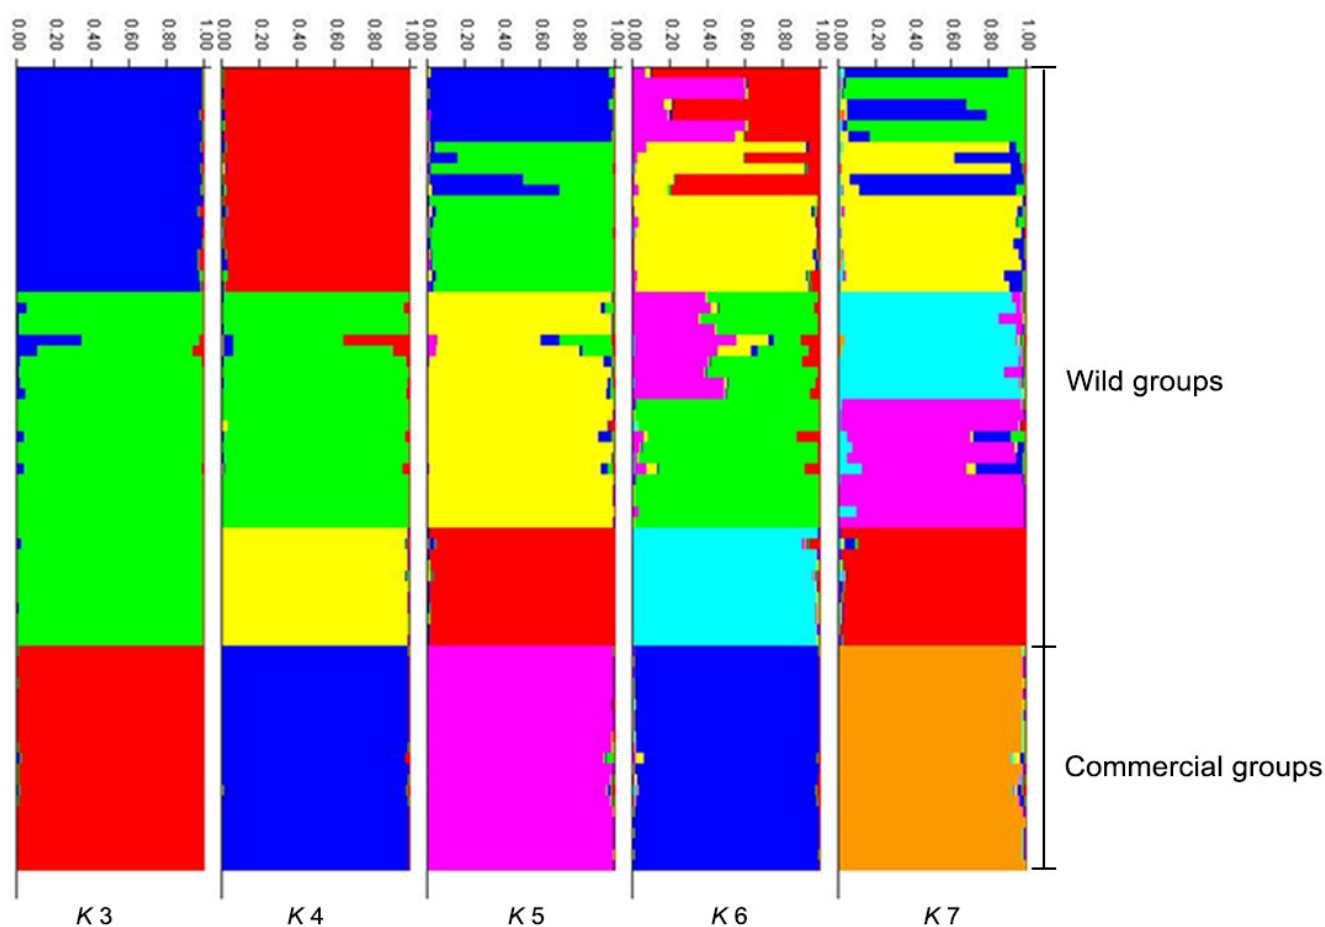

**Figure S4.** Population structure of 75 samples (54 wild and 21 commercial individuals) of Siamese fighting fish (*Betta splendens* Regan, 1910). Plot of Evanno's  $\Delta K$ . Structure bar plots depicting the results of model-based clustering inferred for  $K=3$ . Inferred genetic clusters are indicated by different colors. Each vertical bar on the x-axis represents an individual, and the y-axis represents the proportion of membership (posterior probability) in each genetic cluster,.

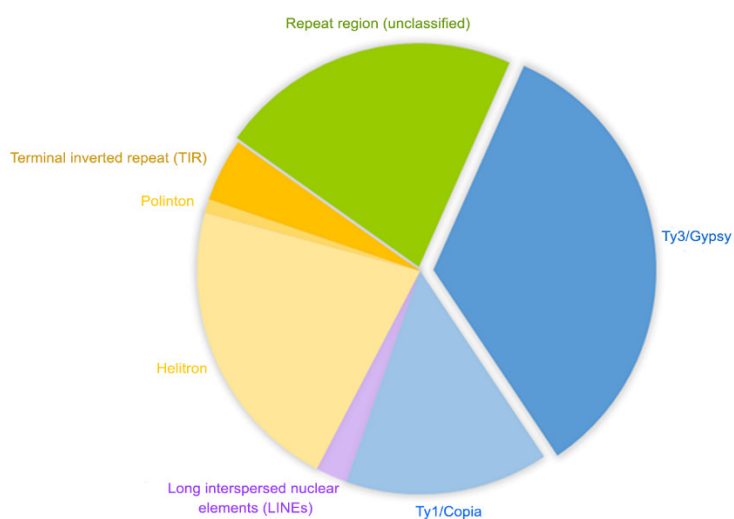

**Figure S5.** Repeat searches for single-nucleotide polymorphisms and restriction fragments of male-linked loci in Siamese fighting fish (*Betta splendens* Regan, 1910).

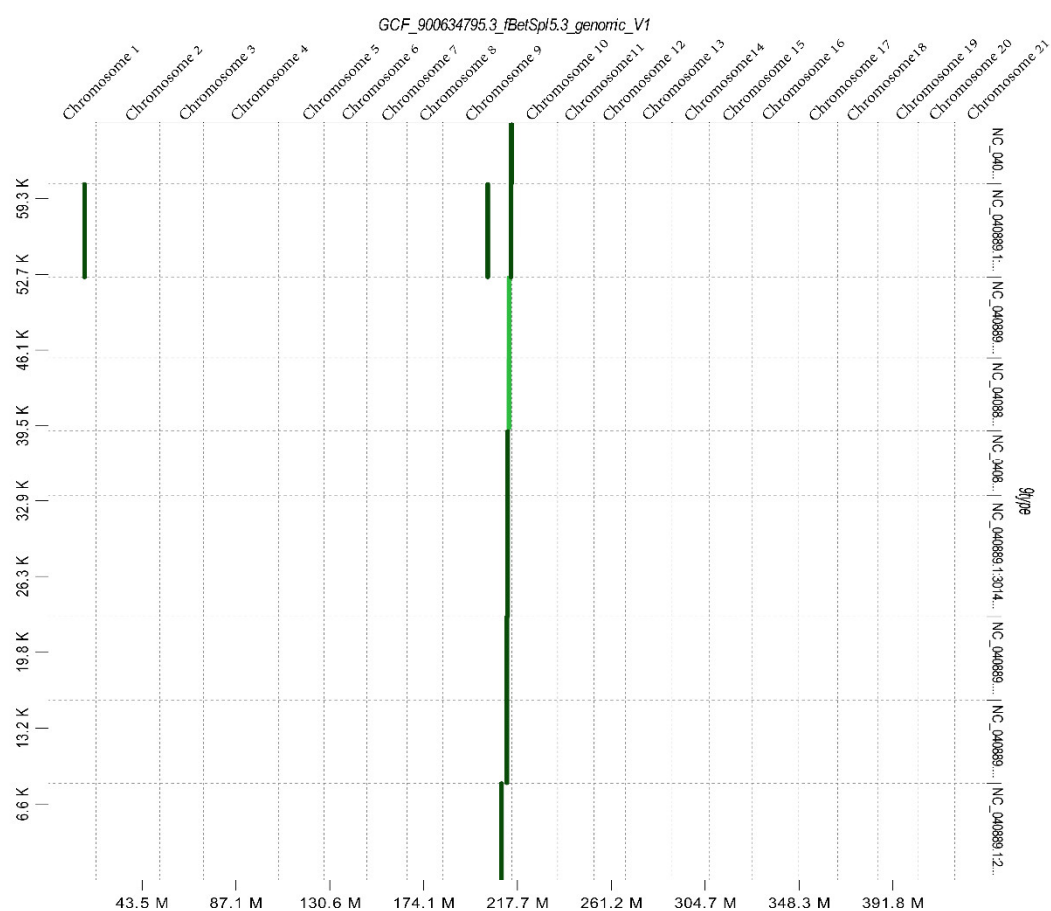

**Figure S6.** All copy numbers were intensively located on chromosome 9 of Siamese fighting fish (*Betta splendens* Regan, 1910), with a few observed on chromosome 1.

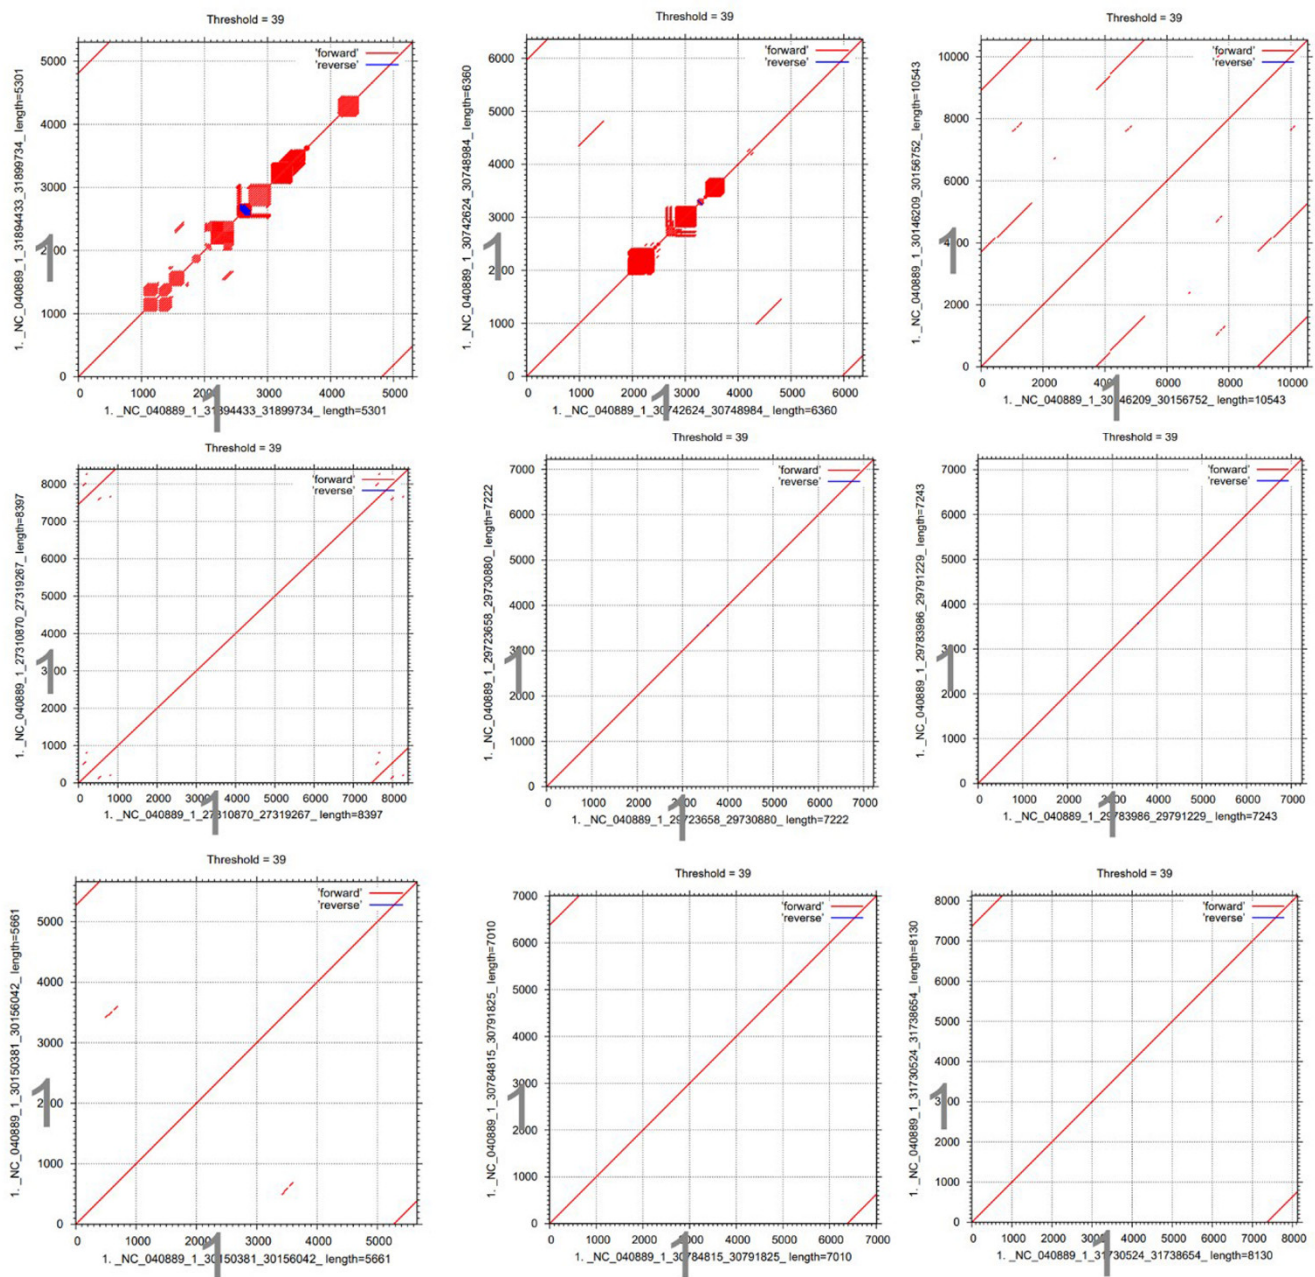

**Figure S7.** Dot matrix analysis showing that two of nine types had tandem-arrayed repetitive sequences.



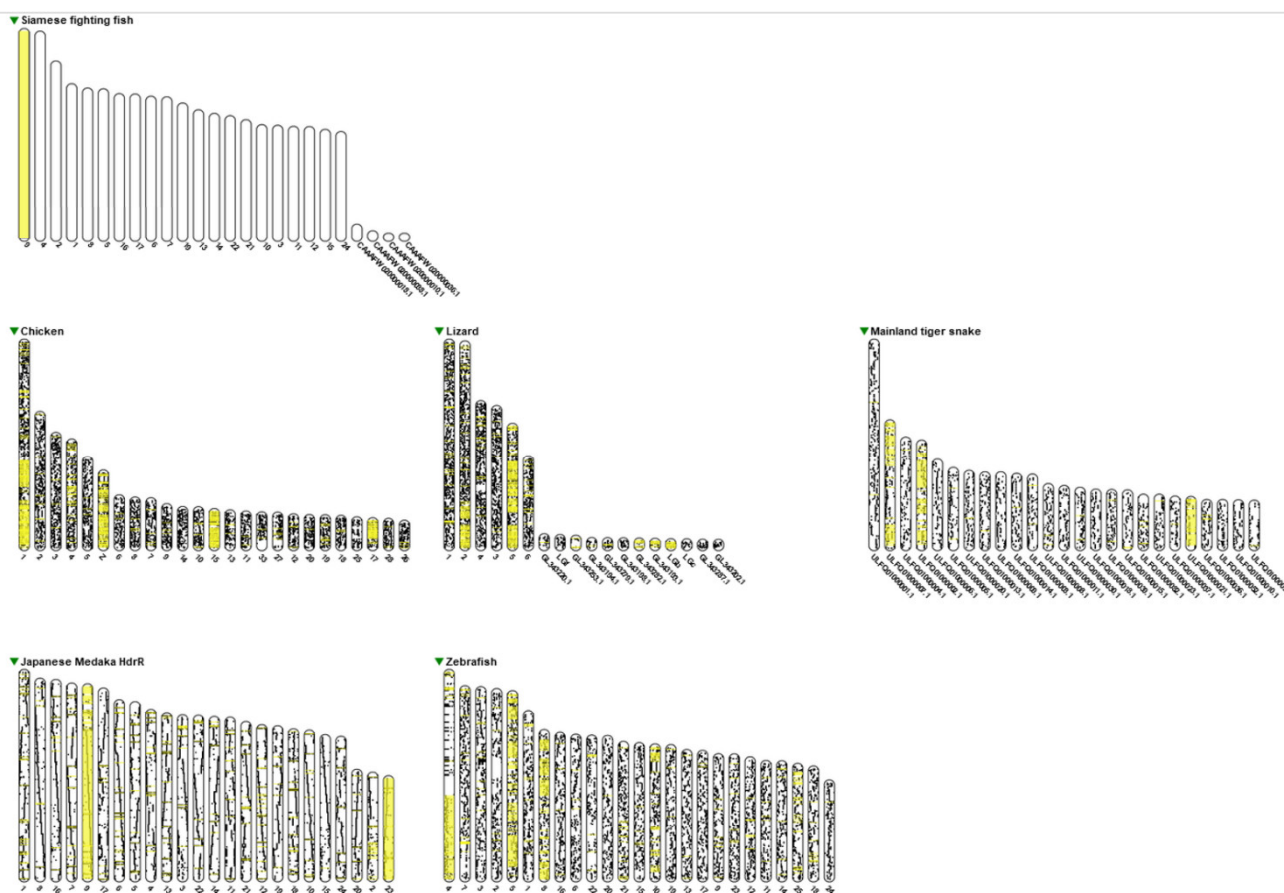

**Figure S8.** Multi-karyotypes of Siamese fighting fish (*Betta splendens* Regan, 1910) with whole-genome sequences compared to those of other vertebrates.
